# Supplementary material
Source: publisher figshare collection journal article supplement (https://tandf.figshare.com/ndownloader/files/15888860)
Supplement: Supplementary file 1 [file 15888860]

**Supplement**

| **ρ/P Value** | **IL-8** | **MCP-1** | **MMP-1** | **MMP-2** | **MMP-3** | **MMP-9** | **SAA** | **TGF-1** | **TGF-2** | **TGF-3** | **TNF-** |
| --- | --- | --- | --- | --- | --- | --- | --- | --- | --- | --- | --- |
| **IL-8** |  | **<0.0001*** | **0.0001*** | **0.0005*** | **<0.0001*** | **<0.0001*** | **0.0002*** | **0.0011*** | 0.5428 | 0.8670 | **<0.0001*** |
| **MCP-1** | 0.736 |  | 0.0150 | 0.1012 | **<0.0001*** | **<0.0001*** | 0.0073 | 0.1235 | 0.4170 | 0.0967 | **<0.0001*** |
| **MMP-1** | 0.585 | 0.375 |  | **0.0001*** | **<0.0001*** | 0.0144 | **<0.0001*** | 0.0114 | 0.4959 | 0.1476 | **<0.0001*** |
| **MMP-2** | 0.540 | 0.253 | 0.591 |  | **<0.0001*** | 0.1520 | **0.0002*** | **0.0001*** | 0.0102 | 0.5698 | **<0.0001*** |
| **MMP-3** | 0.825 | 0.63 | 0.701 | 0.698 |  | **0.0001*** | **<0.0001*** | **0.0001*** | 0.2292 | 0.8985 | **<0.0001*** |
| **MMP-9** | 0.782 | 0.73 | 0.378 | 0.221 | 0.618 |  | **0.0035*** | 0.1142 | 0.1865 | 0.4789 | **<0.0001*** |
| **SAA** | 0.581 | 0.414 | 0.678 | 0.574 | 0.731 | 0.45 |  | **0.0002*** | 0.3749 | 0.271 | **<0.0001*** |
| **TGF-1** | 0.554 | 0.260 | 0.428 | 0.659 | 0.648 | 0.267 | 0.628 |  | **0.0001*** | 0.0897 | 0.0080 |
| **TGF-2** | 0.103 | -0.137 | 0.115 | 0.434 | 0.203 | -0.223 | 0.150 | 0.659 |  | 0.07 | 0.5041 |
| **TGF-3** | -0.028 | -0.281 | 0.245 | 0.0961 | 0.0216 | -0.12 | 0.186 | 0.287 | 0.297 |  | 0.8954 |
| **TNF-** | 0.761 | 0.687 | 0.589 | 0.445 | 0.785 | 0.719 | 0.7 | 0.448 | -0.113 | -0.0222 |  |

**Supplement** Correlation between cytokines, chemokines and MMPs. Significant positive correlations were calculated for IL-8 and TNF-which are correlated with all other cytokines, chemokines, and MMPs, except for TGF2 and TGF3. TGF-2 and TGF3 concentrations are not significantly correlated with the other soluble immune mediators, except for TGF2 with TGF1. Correlation coefficient (ρ) and P values for each pair of cytokines, chemokines or MMPs were calculated by Spearman`s correlation test. *Significant when P<0.0045 after Bonferroni correction for multiple comparisons.
